# Supplementary material
Source: PubMed Central journal article supplement (PMC4700881)
Supplement: NIHMS739209-supplement-01.pdf [file NIHMS739209-supplement-01.pdf]

**SUPPLEMENTAL MATERIAL**

**Supplemental Table. The association of cumulative exposure to overall cardiovascular risk factors and cognitive function at mid-life adjusting for or excluding incident cardiovascular events\***

|                                                     | <b>Rey Auditory Verbal<br/>Learning– delayed<br/>Standardized<br/>difference *<br/>(95% CI)</b> | <b>Digit Symbol<br/>Substitution Test<br/>Standardized<br/>difference<br/>(95% CI)</b> | <b>Stroop Interference<br/>Standardized<br/>difference<br/>(95% CI)</b> |
|-----------------------------------------------------|-------------------------------------------------------------------------------------------------|----------------------------------------------------------------------------------------|-------------------------------------------------------------------------|
| <b>Adjusting for incident cardiovascular events</b> |                                                                                                 |                                                                                        |                                                                         |
| Systolic Blood Pressure                             | -0.09 (-0.15, -0.03) <sup>‡</sup>                                                               | -0.11 (-0.16, -0.05) <sup>†</sup>                                                      | -0.10 (-0.16, -0.03) <sup>‡</sup>                                       |
| Diastolic Blood Pressure                            | -0.05 (-0.10, 0.0)                                                                              | -0.06 (-0.11, -0.01) <sup>§</sup>                                                      | -0.07 (-0.13, -0.02) <sup>§</sup>                                       |
| Fasting Blood Glucose                               | -0.06 (-0.11, -0.02) <sup>‡</sup>                                                               | -0.07 (-0.11, -0.02) <sup>‡</sup>                                                      | -0.06 (-0.10, -0.01) <sup>§</sup>                                       |
| Total Cholesterol                                   | -0.05 (-0.10, -0.01) <sup>§</sup>                                                               | 0.01 (-0.03, 0.05)                                                                     | -0.02 (-0.06, 0.02)                                                     |
| <b>Excluding incident cardiovascular events</b>     |                                                                                                 |                                                                                        |                                                                         |
| Systolic Blood Pressure                             | -0.08 (-0.15, -0.02) <sup>‡</sup>                                                               | -0.10 (-0.16, -0.04) <sup>‡</sup>                                                      | -0.11 (-0.18, -0.05) <sup>†</sup>                                       |
| Diastolic Blood Pressure                            | -0.05 (-0.10, 0.1)                                                                              | -0.06 (-0.12, -0.01) <sup>§</sup>                                                      | -0.09 (-0.15, -0.03) <sup>‡</sup>                                       |
| Fasting Blood Glucose                               | -0.05 (-0.09, 0.0)                                                                              | -0.07 (-0.12, -0.03) <sup>‡</sup>                                                      | -0.08 (-0.13, -0.03) <sup>‡</sup>                                       |
| Total Cholesterol                                   | -0.05 (-0.09, -0.01) <sup>§</sup>                                                               | 0.0 (-0.04, 0.04)                                                                      | -0.03 (-0.07, 0.02)                                                     |

\*Adjusted for age, race, sex and education

<sup>†</sup> p<0.001

<sup>‡</sup> p<0.01

<sup>§</sup> p<0.05
